# Supplementary material
Source: MDPI journal article supplement (https://www.mdpi.com/2073-4441/13/24/3619)
Supplement: s1 [file s1]

# Supplementary Material 4 - In situ excystment (inverted traps)

|                                              | 2010    |        |       |       |        |       |       | 2011  |       |        |       |       |       |       |       |       |
|----------------------------------------------|---------|--------|-------|-------|--------|-------|-------|-------|-------|--------|-------|-------|-------|-------|-------|-------|
|                                              | sep 1   | sep 2  | sep 3 | nov 1 | nov 2  | nov 3 | dec 2 | may 1 | may 2 | may 3  | jul 1 | jul 2 | jul 3 | aug 1 | aug 2 | sep 1 |
| <i>Akashiwo sanguinea</i>                    | 0,0     | 0,0    | 0,0   | 0,0   | 8854,2 | 0,0   | 0,0   | 520,8 | 0,0   | 0,0    | 0,0   | 0,0   | 0,0   | 0,0   | 0,0   | 0,0   |
| <i>Alexandrium</i> cf. <i>minutum</i>        | 0,0     | 0,0    | 0,0   | 0,0   | 0,0    | 0,0   | 0,0   | 0,0   | 260,4 | 0,0    | 520,8 | 0,0   | 0,0   | 0,0   | 0,0   | 0,0   |
| <i>Alexandrium</i> sp.                       | 0,0     | 347,2  | 0,0   | 260,4 | 1302,1 | 260,4 | 0,0   | 0,0   | 520,8 | 520,8  | 520,8 | 0,0   | 0,0   | 0,0   | 0,0   | 0,0   |
| <i>Ceratium furca</i>                        | 0,0     | 0,0    | 0,0   | 0,0   | 0,0    | 0,0   | 0,0   | 0,0   | 0,0   | 260,4  | 0,0   | 0,0   | 0,0   | 0,0   | 0,0   | 0,0   |
| <i>Ceratium</i> cf. <i>longipes</i>          | 347,2   | 0,0    | 0,0   | 0,0   | 0,0    | 0,0   | 0,0   | 0,0   | 0,0   | 0,0    | 0,0   | 0,0   | 0,0   | 0,0   | 0,0   | 0,0   |
| <i>Dinophysis</i> cf. <i>sacculus</i>        | 2083,3  | 0,0    | 0,0   | 0,0   | 0,0    | 0,0   | 0,0   | 0,0   | 0,0   | 0,0    | 0,0   | 0,0   | 0,0   | 0,0   | 0,0   | 0,0   |
| <i>Dinophysis</i> sp.                        | 0,0     | 0,0    | 0,0   | 0,0   | 260,4  | 0,0   | 0,0   | 0,0   | 0,0   | 0,0    | 0,0   | 0,0   | 0,0   | 0,0   | 0,0   | 0,0   |
| <i>Diplopsalis lenticula</i>                 | 0,0     | 0,0    | 0,0   | 0,0   | 260,4  | 0,0   | 0,0   | 0,0   | 0,0   | 260,4  | 0,0   | 0,0   | 0,0   | 0,0   | 0,0   | 0,0   |
| <i>Goniodoma</i> sp.                         | 0,0     | 0,0    | 0,0   | 0,0   | 260,4  | 0,0   | 0,0   | 0,0   | 0,0   | 0,0    | 0,0   | 0,0   | 0,0   | 0,0   | 0,0   | 0,0   |
| <i>Gonyaulax</i> cf. <i>polygramma</i>       | 347,2   | 0,0    | 0,0   | 0,0   | 0,0    | 0,0   | 0,0   | 0,0   | 0,0   | 0,0    | 0,0   | 0,0   | 0,0   | 0,0   | 0,0   | 0,0   |
| <i>Gonyaulax</i> cf. <i>scrippsae</i>        | 347,2   | 0,0    | 0,0   | 0,0   | 0,0    | 0,0   | 0,0   | 0,0   | 0,0   | 0,0    | 0,0   | 0,0   | 0,0   | 0,0   | 0,0   | 0,0   |
| <i>Gonyaulax spinifera</i>                   | 3125,0  | 1736,1 | 0,0   | 0,0   | 260,4  | 0,0   | 0,0   | 0,0   | 0,0   | 0,0    | 260,4 | 0,0   | 0,0   | 0,0   | 0,0   | 0,0   |
| <i>Gonyaulax</i> sp.                         | 0,0     | 0,0    | 0,0   | 0,0   | 0,0    | 0,0   | 0,0   | 0,0   | 520,8 | 260,4  | 0,0   | 0,0   | 0,0   | 0,0   | 0,0   | 0,0   |
| <i>Gymnodinium</i> sp.                       | 0,0     | 0,0    | 0,0   | 0,0   | 520,8  | 0,0   | 0,0   | 260,4 | 0,0   | 260,4  | 0,0   | 0,0   | 0,0   | 0,0   | 0,0   | 0,0   |
| <i>Oblea rotunda</i>                         | 694,4   | 0,0    | 260,4 | 0,0   | 260,4  | 0,0   | 0,0   | 0,0   | 0,0   | 0,0    | 0,0   | 0,0   | 0,0   | 0,0   | 0,0   | 0,0   |
| <i>Oxyphysis</i> sp.                         | 3125,0  | 0,0    | 0,0   | 0,0   | 0,0    | 0,0   | 0,0   | 0,0   | 0,0   | 0,0    | 0,0   | 0,0   | 0,0   | 0,0   | 0,0   | 0,0   |
| <i>Pentapharsodinium</i> cf. <i>dalei</i>    | 347,2   | 0,0    | 0,0   | 0,0   | 0,0    | 0,0   | 0,0   | 0,0   | 260,4 | 0,0    | 0,0   | 0,0   | 0,0   | 0,0   | 0,0   | 0,0   |
| <i>Prorocentrum micans</i>                   | 347,2   | 1388,9 | 0,0   | 0,0   | 0,0    | 0,0   | 0,0   | 0,0   | 0,0   | 260,4  | 260,4 | 260,4 | 0,0   | 0,0   | 0,0   | 0,0   |
| <i>Prorocentrum</i> cf. <i>triestinum</i>    | 3819,4  | 0,0    | 0,0   | 0,0   | 0,0    | 0,0   | 0,0   | 0,0   | 0,0   | 0,0    | 0,0   | 0,0   | 0,0   | 0,0   | 0,0   | 0,0   |
| <i>Protoberidinium mite</i>                  | 19791,7 | 0,0    | 0,0   | 0,0   | 1302,1 | 0,0   | 0,0   | 0,0   | 0,0   | 1041,7 | 0,0   | 0,0   | 0,0   | 0,0   | 0,0   | 0,0   |
| <i>Protoberidinium oblongum</i>              | 347,2   | 0,0    | 0,0   | 0,0   | 0,0    | 0,0   | 0,0   | 0,0   | 0,0   | 0,0    | 0,0   | 0,0   | 0,0   | 0,0   | 0,0   | 0,0   |
| <i>Protoberidinium</i> cf. <i>pacificum</i>  | 0,0     | 0,0    | 0,0   | 0,0   | 0,0    | 0,0   | 0,0   | 0,0   | 0,0   | 781,3  | 260,4 | 0,0   | 0,0   | 0,0   | 0,0   | 0,0   |
| <i>Protoberidinium</i> cf. <i>pyriforme</i>  | 347,2   | 0,0    | 0,0   | 0,0   | 0,0    | 0,0   | 0,0   | 0,0   | 0,0   | 0,0    | 0,0   | 0,0   | 0,0   | 0,0   | 0,0   | 0,0   |
| <i>Protoberidinium</i> cf. <i>steinii</i>    | 347,2   | 0,0    | 0,0   | 0,0   | 0,0    | 0,0   | 0,0   | 0,0   | 0,0   | 0,0    | 0,0   | 0,0   | 0,0   | 0,0   | 0,0   | 0,0   |
| <i>Protoberidinium</i> cf. <i>subinermis</i> | 694,4   | 0,0    | 0,0   | 0,0   | 0,0    | 0,0   | 0,0   | 0,0   | 0,0   | 0,0    | 0,0   | 0,0   | 0,0   | 0,0   | 0,0   | 0,0   |
| <i>Protoberidinium</i> sp.c                  | 0,0     | 347,2  | 0,0   | 0,0   | 0,0    | 0,0   | 0,0   | 0,0   | 0,0   | 0,0    | 0,0   | 0,0   | 0,0   | 0,0   | 0,0   | 0,0   |
| <i>Scrippsiella</i> cf. <i>acuminata</i>     | 10763,9 | 1041,7 | 0,0   | 0,0   | 260,4  | 0,0   | 0,0   | 0,0   | 260,4 | 520,8  | 0,0   | 0,0   | 0,0   | 0,0   | 0,0   | 0,0   |
| <i>Scrippsiella</i> cf. <i>spinifera</i>     | 15625,0 | 1041,7 | 0,0   | 0,0   | 0,0    | 0,0   | 0,0   | 0,0   | 0,0   | 0,0    | 260,4 | 0,0   | 0,0   | 0,0   | 0,0   | 0,0   |
| <i>Scrippsiella</i> sp.                      | 0,0     | 347,2  | 260,4 | 260,4 | 260,4  | 0,0   | 0,0   | 520,8 | 0,0   | 260,4  | 260,4 | 0,0   | 0,0   | 0,0   | 0,0   | 0,0   |
| <i>Dinophyta</i> sp.                         | 0,0     | 347,2  | 0,0   | 0,0   | 0,0    | 0,0   | 0,0   | 0,0   | 0,0   | 0,0    | 0,0   | 0,0   | 0,0   | 0,0   | 0,0   | 0,0   |
| <i>Tintinnopsis</i> sp.                      | 0,0     | 0,0    | 0,0   | 0,0   | 260,4  | 0,0   | 0,0   | 0,0   | 0,0   | 0,0    | 0,0   | 0,0   | 0,0   | 0,0   | 0,0   | 0,0   |
| <i>Ciliophora</i> sp.b                       | 0,0     | 0,0    | 0,0   | 0,0   | 520,8  | 520,8 | 0,0   | 0,0   | 0,0   | 0,0    | 0,0   | 0,0   | 0,0   | 0,0   | 0,0   | 0,0   |
| <i>Ciliophora</i> sp.c                       | 0,0     | 0,0    | 0,0   | 0,0   | 520,8  | 0,0   | 0,0   | 0,0   | 0,0   | 781,3  | 0,0   | 0,0   | 0,0   | 0,0   | 0,0   | 0,0   |
| <i>Ciliophora</i> sp.d                       | 0,0     | 0,0    | 0,0   | 0,0   | 1302,1 | 0,0   | 520,8 | 0,0   | 0,0   | 0,0    | 0,0   | 0,0   | 0,0   | 0,0   | 0,0   | 0,0   |
| <i>Ciliophora</i> sp.e                       | 0,0     | 0,0    | 0,0   | 0,0   | 0,0    | 0,0   | 0,0   | 260,4 | 0,0   | 0,0    | 0,0   | 0,0   | 0,0   | 0,0   | 0,0   | 0,0   |
| <i>Ciliophora</i> sp.f                       | 0,0     | 0,0    | 0,0   | 0,0   | 0,0    | 0,0   | 0,0   | 0,0   | 520,8 | 0,0    | 0,0   | 0,0   | 0,0   | 0,0   | 0,0   | 0,0   |
| excysted m <sup>-2</sup> d <sup>-1</sup>     | 62500   | 6597   | 521   | 521   | 16406  | 781   | 521   | 1563  | 2344  | 5208   | 2344  | 260   | 0     | 0     | 0     | 0     |
| taxa                                         | 17      | 8      | 2     | 2     | 15     | 2     | 1     | 4     | 6     | 11     | 7     | 1     | 0     | 0     | 0     | 0     |
