# Supplementary material
Source: MDPI journal article supplement (https://www.mdpi.com/2073-4441/13/24/3619)
Supplement: s1 [file s1]

# Supplementary Material 5 - Cyst bank in surface sediments (sediment cores)

|                                         | full cysts |       |      |       |       |       |       |       | empty cysts |       |      |       |       |       |       |       |
|-----------------------------------------|------------|-------|------|-------|-------|-------|-------|-------|-------------|-------|------|-------|-------|-------|-------|-------|
|                                         | sep 1      | nov 1 | dec3 | may 1 | jun 1 | jul 3 | aug 1 | sep 2 | sep 1       | nov 1 | dec3 | may 1 | jun 1 | jul 3 | aug 1 | sep 2 |
| <i>Alexandrium minutum</i>              | 0          | 4     | 1    | 1     | 4     | 3     | 0     | 2     | 0           | 0     | 0    | 0     | 0     | 0     | 1     | 1     |
| <i>Alexandrium tamarense</i>            | 2          | 0     | 0    | 0     | 0     | 0     | 2     | 1     | 0           | 0     | 0    | 0     | 0     | 0     | 0     | 3     |
| <i>Alexandrium</i> sp.1                 | 0          | 0     | 0    | 0     | 7     | 0     | 0     | 0     | 0           | 0     | 0    | 0     | 0     | 0     | 0     | 0     |
| <i>Alexandrium</i> sp.2                 | 3          | 1     | 1    | 1     | 4     | 0     | 0     | 1     | 0           | 0     | 0    | 0     | 0     | 0     | 0     | 0     |
| <i>Alexandrium</i> sp.4                 | 1          | 3     | 0    | 0     | 2     | 1     | 0     | 0     | 0           | 0     | 0    | 0     | 0     | 0     | 0     | 0     |
| <i>Alexandrium</i> sp.7                 | 4          | 0     | 0    | 1     | 6     | 0     | 0     | 2     | 0           | 0     | 0    | 0     | 0     | 0     | 0     | 0     |
| <i>Alexandrium</i> sp.8                 | 0          | 0     | 1    | 0     | 0     | 0     | 0     | 0     | 0           | 0     | 0    | 0     | 0     | 0     | 0     | 0     |
| cf. <i>Calciodinellum albatrosianum</i> | 15         | 22    | 22   | 24    | 31    | 17    | 21    | 20    | 11          | 8     | 22   | 9     | 10    | 24    | 14    | 18    |
| <i>Calciodinellum operosum</i>          | 2          | 3     | 1    | 1     | 7     | 2     | 1     | 4     | 0           | 0     | 0    | 0     | 0     | 0     | 0     | 0     |
| <i>Calciperidinium asymmetricum</i>     | 0          | 2     | 1    | 3     | 0     | 1     | 1     | 1     | 2           | 3     | 4    | 5     | 6     | 2     | 1     | 2     |
| <i>Cochlodinium polykrikoides</i>       | 0          | 0     | 0    | 0     | 0     | 0     | 0     | 0     | 0           | 0     | 0    | 0     | 2     | 0     | 0     | 0     |
| <i>Diplopsalis lenticula</i>            | 2          | 0     | 3    | 0     | 2     | 9     | 0     | 0     | 0           | 0     | 3    | 3     | 5     | 0     | 3     | 3     |
| cf. <i>Dissodinium pseudocalani</i>     | 0          | 0     | 0    | 1     | 2     | 0     | 1     | 1     | 0           | 0     | 0    | 0     | 0     | 0     | 0     | 0     |
| <i>Follisdinellum splendidum</i>        | 1          | 3     | 1    | 1     | 3     | 5     | 4     | 6     | 0           | 4     | 1    | 4     | 6     | 2     | 1     | 1     |
| <i>Gonyaulax</i> group                  | 32         | 34    | 14   | 22    | 44    | 25    | 30    | 25    | 7           | 14    | 7    | 17    | 20    | 17    | 10    | 5     |
| <i>Gymnodinium impudicum</i>            | 165        | 88    | 101  | 74    | 89    | 71    | 54    | 44    | 70          | 30    | 69   | 78    | 79    | 63    | 70    | 49    |
| <i>Gymnodinium</i> cf. <i>litoralis</i> | 71         | 27    | 30   | 11    | 45    | 32    | 28    | 13    | 18          | 18    | 17   | 14    | 16    | 12    | 21    | 15    |
| <i>Gymnodinium</i> sp.1                 | 0          | 0     | 0    | 0     | 0     | 0     | 0     | 0     | 0           | 0     | 0    | 1     | 0     | 0     | 0     | 0     |
| <i>Gymnodinium</i> sp.7                 | 0          | 1     | 0    | 0     | 0     | 0     | 0     | 0     | 0           | 0     | 0    | 0     | 0     | 0     | 0     | 0     |
| <i>Lingulodinium polyedrum</i>          | 11         | 11    | 4    | 6     | 10    | 5     | 6     | 5     | 10          | 5     | 5    | 13    | 4     | 6     | 11    | 9     |
| <i>Melodomoncula berlinensis</i>        | 4          | 9     | 10   | 5     | 10    | 4     | 6     | 5     | 13          | 4     | 9    | 14    | 16    | 6     | 18    | 18    |
| <i>Nematodinium armatum</i>             | 0          | 3     | 0    | 0     | 0     | 0     | 0     | 0     | 0           | 0     | 1    | 0     | 0     | 0     | 0     | 0     |
| <i>Oblea rotunda</i>                    | 0          | 0     | 3    | 24    | 24    | 2     | 2     | 8     | 0           | 0     | 0    | 1     | 1     | 0     | 0     | 0     |
| <i>Pentapharsodinium dalei</i>          | 11         | 8     | 13   | 17    | 32    | 23    | 17    | 13    | 0           | 1     | 1    | 0     | 2     | 0     | 0     | 0     |
| <i>Pentapharsodinium tyrrenicum</i>     | 51         | 50    | 57   | 68    | 70    | 43    | 49    | 75    | 33          | 49    | 53   | 45    | 41    | 46    | 38    | 56    |
| <i>Polykrikos hartmannii</i>            | 0          | 0     | 1    | 0     | 0     | 0     | 1     | 0     | 0           | 0     | 0    | 0     | 0     | 0     | 0     | 0     |
| <i>Polykrikos schwartzii</i>            | 0          | 0     | 0    | 1     | 0     | 0     | 0     | 0     | 3           | 2     | 0    | 4     | 4     | 1     | 1     | 0     |
| <i>Posoniella tricarinioides</i>        | 13         | 12    | 17   | 13    | 14    | 16    | 22    | 21    | 8           | 6     | 3    | 7     | 4     | 11    | 9     | 9     |
| <i>Protoperidinium claudicans</i>       | 0          | 0     | 0    | 0     | 0     | 0     | 0     | 1     | 0           | 0     | 0    | 1     | 0     | 1     | 0     | 0     |
| <i>Protoperidinium compressum</i>       | 2          | 0     | 1    | 3     | 0     | 0     | 0     | 6     | 3           | 3     | 3    | 9     | 3     | 4     | 8     | 3     |
| <i>Protoperidinium conicum</i>          | 5          | 4     | 0    | 3     | 1     | 1     | 1     | 0     | 2           | 0     | 4    | 9     | 6     | 3     | 4     | 1     |
| <i>Protoperidinium oblongum</i>         | 2          | 5     | 6    | 0     | 4     | 1     | 4     | 5     | 0           | 0     | 1    | 0     | 0     | 0     | 0     | 0     |
| <i>Protoperidinium parthenopes</i>      | 0          | 0     | 0    | 3     | 10    | 1     | 3     | 3     | 0           | 0     | 3    | 0     | 0     | 1     | 0     | 0     |
| <i>Protoperidinium quinquecome</i>      | 0          | 0     | 1    | 1     | 2     | 0     | 0     | 1     | 0           | 0     | 0    | 0     | 0     | 0     | 0     | 0     |
| <i>Protoperidinium shanghaiense</i>     | 1          | 0     | 0    | 0     | 0     | 0     | 0     | 0     | 3           | 1     | 0    | 0     | 2     | 0     | 3     | 0     |
| <i>Protoperidinium thorianum</i>        | 2          | 0     | 0    | 0     | 4     | 0     | 3     | 0     | 0           | 3     | 1    | 1     | 3     | 4     | 1     | 0     |
| <i>Protoperidinium</i> sp.1             | 6          | 4     | 1    | 25    | 4     | 10    | 16    | 0     | 0           | 0     | 0    | 0     | 2     | 2     | 1     | 0     |
| <i>Protoperidinium</i> sp.4             | 0          | 0     | 0    | 0     | 0     | 0     | 0     | 0     | 0           | 0     | 1    | 1     | 1     | 1     | 2     | 1     |
| <i>Pyrophacus horologium</i>            | 0          | 0     | 0    | 0     | 0     | 0     | 0     | 0     | 0           | 1     | 0    | 0     | 0     | 1     | 0     | 0     |
| <i>Scrippsiella acuminata</i>           | 280        | 255   | 294  | 286   | 419   | 298   | 294   | 305   | 141         | 90    | 88   | 126   | 165   | 117   | 107   | 145   |
| <i>Scrippsiella erinaceus</i>           | 37         | 22    | 19   | 37    | 27    | 32    | 20    | 32    | 3           | 2     | 3    | 0     | 5     | 2     | 2     | 6     |
| <i>Scrippsiella lachrymosa</i>          | 9          | 8     | 1    | 9     | 17    | 3     | 4     | 1     | 2           | 2     | 1    | 1     | 2     | 1     | 0     | 3     |
| <i>Scrippsiella precaria</i>            | 0          | 0     | 0    | 7     | 0     | 0     | 0     | 0     | 0           | 0     | 0    | 0     | 0     | 0     | 0     | 0     |
| <i>Scrippsiella ramoni</i>              | 10         | 7     | 8    | 5     | 12    | 3     | 9     | 13    | 8           | 1     | 7    | 8     | 7     | 2     | 1     | 5     |
| <i>Scrippsiella spinifera</i>           | 0          | 2     | 0    | 1     | 0     | 1     | 0     | 0     | 0           | 0     | 0    | 0     | 0     | 0     | 0     | 0     |
| <i>Scrippsiella</i> sp.1                | 69         | 56    | 59   | 54    | 97    | 77    | 69    | 78    | 15          | 10    | 34   | 27    | 42    | 23    | 17    | 26    |
| <i>Scrippsiella</i> sp.4                | 6          | 2     | 6    | 3     | 0     | 1     | 4     | 9     | 0           | 0     | 0    | 0     | 0     | 0     | 0     | 0     |
| <i>Scrippsiella</i> sp.5                | 5          | 15    | 6    | 16    | 7     | 15    | 10    | 22    | 0           | 0     | 0    | 0     | 0     | 0     | 0     | 0     |
| <i>Scrippsiella</i> sp.6                | 2          | 0     | 4    | 1     | 13    | 6     | 4     | 3     | 3           | 2     | 0    | 5     | 0     | 2     | 1     | 1     |
| <i>Scrippsiella</i> sp.8                | 0          | 0     | 1    | 0     | 2     | 0     | 0     | 0     | 0           | 0     | 0    | 0     | 0     | 0     | 0     | 0     |
| <i>Thoracosphaeraceae</i> sp.           | 2          | 2     | 1    | 1     | 0     | 0     | 3     | 0     | 0           | 0     | 0    | 0     | 0     | 0     | 0     | 0     |
| <i>Dinophyta</i> sp.2                   | 0          | 0     | 0    | 1     | 1     | 0     | 0     | 3     | 0           | 0     | 1    | 0     | 0     | 0     | 0     | 0     |
| <i>Dinophyta</i> sp.33                  | 0          | 0     | 0    | 3     | 3     | 3     | 0     | 1     | 0           | 0     | 0    | 0     | 0     | 0     | 0     | 0     |
| cf. <i>Cyrtostrombidium boreale</i>     | 0          | 0     | 0    | 1     | 0     | 0     | 0     | 0     | 0           | 0     | 0    | 0     | 0     | 0     | 0     | 0     |
| <i>Hexasterias problematica</i>         | 2          | 0     | 2    | 0     | 0     | 0     | 0     | 0     | 0           | 0     | 0    | 0     | 2     | 0     | 0     | 0     |
| <i>Laboea strobila</i>                  | 0          | 1     | 0    | 6     | 1     | 4     | 1     | 0     | 0           | 0     | 0    | 0     | 0     | 0     | 0     | 0     |
| <i>Strombidium acutum</i>               | 2          | 0     | 0    | 0     | 2     | 1     | 1     | 10    | 1           | 1     | 4    | 1     | 6     | 4     | 2     | 1     |
| <i>Strombidium biarmatum</i>            | 0          | 0     | 0    | 3     | 0     | 0     | 1     | 0     | 0           | 0     | 0    | 0     | 0     | 0     | 0     | 0     |
| <i>Strombidium conicum</i>              | 7          | 9     | 5    | 12    | 13    | 17    | 19    | 0     | 2           | 0     | 1    | 6     | 14    | 3     | 1     | 5     |
| <i>Ciliophora</i> sp.4                  | 0          | 0     | 0    | 0     | 0     | 0     | 0     | 0     | 0           | 0     | 0    | 0     | 0     | 0     | 0     | 1     |
| <i>Ciliophora</i> sp.5                  | 0          | 0     | 0    | 1     | 2     | 0     | 0     | 3     | 0           | 0     | 0    | 0     | 0     | 1     | 0     | 0     |
| <i>Synchaeta</i> sp.1 (smooth)          | 0          | 0     | 1    | 0     | 0     | 0     | 0     | 0     | 0           | 0     | 0    | 0     | 0     | 0     | 0     | 0     |
| <i>Synchaeta</i> sp.2 (tubular)         | 4          | 0     | 7    | 1     | 10    | 9     | 5     | 7     | 3           | 2     | 3    | 5     | 4     | 8     | 3     | 7     |
| <i>Acartia italica</i>                  | 0          | 1     | 0    | 1     | 0     | 0     | 0     | 0     | 0           | 0     | 0    | 0     | 0     | 0     | 0     | 0     |
| <i>Centropages</i> sp. (resting egg)    | 1          | 0     | 1    | 0     | 0     | 0     | 0     | 0     | 0           | 0     | 0    | 0     | 0     | 0     | 0     | 0     |
| <i>Paracartia latisetosa</i>            | 3          | 1     | 7    | 3     | 4     | 4     | 3     | 5     | 1           | 0     | 1    | 1     | 0     | 3     | 1     | 1     |
| <i>Pteriacartia josephinae</i>          | 0          | 0     | 1    | 0     | 0     | 0     | 0     | 0     | 0           | 0     | 0    | 0     | 0     | 0     | 0     | 0     |
| Resting Egg 9                           | 0          | 1     | 2    | 1     | 7     | 3     | 1     | 5     | 0           | 0     | 0    | 0     | 0     | 0     | 0     | 0     |
| cysts g <sup>-1</sup>                   | 841        | 674   | 719  | 754   | 1094  | 748   | 722   | 761   | 361         | 260   | 352  | 417   | 478   | 377   | 354   | 397   |
| taxa                                    | 37         | 34    | 40   | 45    | 42    | 38    | 37    | 39    | 23          | 25    | 29   | 28    | 30    | 30    | 28    | 27    |
