# Supplementary material
Source: MDPI journal article supplement (https://www.mdpi.com/2073-4441/13/24/3619)
Supplement: s1 [file s1]

# Supplementary Material 3 - Resting stage fluxes (sediment traps)

|                                          | sep 1 | oct 1 | oct 2 | nov 1 | nov 2 | dec 1 | dec 2 | may 1 | may 2 | jun 1 | jun 2 | jul 1 | jul 2 | jul 3 | aug 1 | aug 2 | sep 1 | sep 2 |
|------------------------------------------|-------|-------|-------|-------|-------|-------|-------|-------|-------|-------|-------|-------|-------|-------|-------|-------|-------|-------|
| <i>Alexandrium minutum</i>               | 116   | 250   | 124   | 0     | 93    | 46    |       |       |       | 541   | 714   | 0     | 93    | 108   | 209   | 125   | 43    |       |
| <i>Alexandrium pseudogonyaulax</i>       | 0     | 0     | 0     | 0     | 0     | 0     |       |       |       | 2038  | 346   | 0     | 70    | 72    | 0     | 0     | 0     |       |
| <i>Alexandrium tamarense</i>             | 0     | 0     | 15    | 0     | 0     | 139   |       |       |       | 0     | 22    | 0     | 46    | 36    | 0     | 75    | 0     |       |
| <i>Alexandrium</i> sp.1                  | 348   | 250   | 216   | 0     | 0     | 0     |       |       |       | 90    | 0     | 0     | 46    | 0     | 46    | 0     | 0     |       |
| <i>Alexandrium</i> sp.2                  | 0     | 0     | 113   | 0     | 23    | 139   |       |       |       | 0     | 43    | 0     | 0     | 0     | 0     | 0     | 0     |       |
| <i>Alexandrium</i> sp.4                  | 0     | 0     | 0     | 0     | 0     | 0     |       |       |       | 18    | 0     | 0     | 0     | 0     | 0     | 0     | 0     |       |
| <i>Alexandrium</i> sp.7                  | 0     | 0     | 113   | 0     | 139   | 139   |       |       |       | 0     | 0     | 0     | 0     | 144   | 719   | 275   | 65    |       |
| <i>Alexandrium</i> sp.10                 | 0     | 0     | 0     | 0     | 0     | 0     |       |       |       | 0     | 0     | 0     | 46    | 108   | 0     | 0     | 22    |       |
| cf. <i>Calciadinellum albatrossianum</i> | 696   | 2498  | 773   | 1731  | 1252  | 1160  |       |       |       | 90    | 87    | 125   | 186   | 108   | 46    | 125   | 368   |       |
| <i>Calciadinellum operosum</i>           | 0     | 125   | 0     | 0     | 0     | 0     |       |       |       | 90    | 0     | 0     | 70    | 0     | 0     | 75    | 22    |       |
| <i>Calciopendinium asymmetricum</i>      | 0     | 125   | 51    | 0     | 0     | 93    |       |       |       | 90    | 0     | 25    | 0     | 289   | 139   | 75    | 22    |       |
| <i>Cochlodinium polykroides</i>          | 0     | 0     | 77    | 0     | 0     | 0     |       |       |       | 0     | 0     | 0     | 23    | 0     | 0     | 0     | 22    |       |
| <i>Diplopelta parva</i>                  | 0     | 0     | 0     | 0     | 0     | 0     |       |       |       | 0     | 0     | 0     | 0     | 36    | 0     | 0     | 0     |       |
| <i>Diplopsalis lenticula</i>             | 232   | 0     | 340   | 0     | 0     | 46    |       |       |       | 0     | 0     | 25    | 0     | 0     | 46    | 75    | 0     |       |
| cf. <i>Dissodinium pseudocalani</i>      | 0     | 0     | 0     | 0     | 0     | 0     |       |       |       | 0     | 0     | 0     | 0     | 0     | 0     | 0     | 22    |       |
| <i>Foissiadinium splendium</i>           | 0     | 0     | 51    | 0     | 0     | 46    |       |       |       | 0     | 0     | 0     | 1136  | 216   | 0     | 0     | 87    |       |
| <i>Gonyaulax</i> group                   | 7885  | 3497  | 1103  | 1448  | 1020  | 1252  |       |       |       | 1046  | 9870  | 1798  | 1183  | 2128  | 580   | 799   | 390   |       |
| <i>Gymnodinium impudicum</i>             | 3479  | 3497  | 1845  | 2029  | 742   | 510   |       |       |       | 361   | 173   | 150   | 0     | 0     | 46    | 75    | 65    |       |
| <i>Gymnodinium cf. litoralis</i>         | 1971  | 250   | 237   | 499   | 325   | 325   |       |       |       | 90    | 0     | 75    | 0     | 36    | 46    | 75    | 0     |       |
| <i>Gymnodinium nollerii</i>              | 0     | 0     | 0     | 166   | 46    | 46    |       |       |       | 0     | 108   | 25    | 23    | 108   | 0     | 75    | 0     |       |
| <i>Gymnodinium uncatenatum</i>           | 0     | 0     | 0     | 50    | 186   | 0     |       |       |       | 0     | 0     | 25    | 0     | 0     | 0     | 0     | 0     |       |
| <i>Gymnodinium</i> sp.1                  | 116   | 0     | 0     | 0     | 0     | 0     |       |       |       | 0     | 216   | 0     | 23    | 0     | 0     | 0     | 0     |       |
| <i>Gymnodinium</i> sp.3                  | 0     | 0     | 0     | 0     | 0     | 0     |       |       |       | 0     | 0     | 0     | 0     | 108   | 0     | 25    | 0     |       |
| <i>Gymnodinium</i> sp.4                  | 0     | 0     | 0     | 0     | 0     | 0     |       |       |       | 0     | 0     | 25    | 0     | 0     | 0     | 0     | 0     |       |
| <i>Gymnodinium</i> sp.8                  | 0     | 0     | 0     | 0     | 0     | 0     |       |       |       | 0     | 0     | 25    | 0     | 0     | 0     | 0     | 0     |       |
| <i>Lingulodinium polyedrum</i>           | 116   | 125   | 124   | 83    | 325   | 162   |       |       |       | 0     | 22    | 150   | 348   | 144   | 162   | 574   | 130   |       |
| <i>Melodonomacula berlinensis</i>        | 348   | 0     | 237   | 50    | 139   | 417   |       |       |       | 631   | 152   | 75    | 46    | 180   | 70    | 100   | 152   |       |
| <i>Nematodinium armatum</i>              | 0     | 0     | 0     | 83    | 0     | 0     |       |       |       | 18    | 0     | 0     | 46    | 0     | 0     | 0     | 0     |       |
| <i>Obelia rotunda</i>                    | 1507  | 1124  | 0     | 216   | 46    | 186   |       |       |       | 271   | 303   | 100   | 46    | 180   | 162   | 300   | 2165  |       |
| <i>Pentapleurosodinium dalei</i>         | 1160  | 125   | 423   | 83    | 0     | 0     |       |       |       | 1984  | 844   | 225   | 116   | 216   | 116   | 150   | 216   |       |
| <i>Pentapleurosodinium lythenicum</i>    | 1044  | 1499  | 1819  | 1980  | 1438  | 1763  |       |       |       | 722   | 801   | 1174  | 4290  | 3896  | 1044  | 2073  | 563   |       |
| <i>Polykirkos hartmannii</i>             | 0     | 0     | 0     | 50    | 0     | 0     |       |       |       | 0     | 130   | 50    | 0     | 0     | 70    | 25    | 0     |       |
| <i>Polykirkos kotteri</i>                | 0     | 0     | 0     | 0     | 0     | 0     |       |       |       | 0     | 0     | 0     | 0     | 0     | 23    | 0     | 0     |       |
| <i>Posoniella bicarinellus</i>           | 928   | 0     | 227   | 133   | 278   | 46    |       |       |       | 90    | 22    | 0     | 70    | 649   | 209   | 125   | 173   |       |
| <i>Protoperidinium compressum</i>        | 0     | 0     | 77    | 50    | 0     | 0     |       |       |       | 0     | 0     | 0     | 0     | 0     | 0     | 0     | 0     |       |
| <i>Protoperidinium conicum</i>           | 0     | 0     | 387   | 83    | 116   | 46    |       |       |       | 36    | 22    | 0     | 0     | 72    | 0     | 25    | 0     |       |
| <i>Protoperidinium oblongum</i>          | 116   | 999   | 1695  | 0     | 93    | 232   |       |       |       | 90    | 43    | 0     | 0     | 36    | 46    | 25    | 0     |       |
| <i>Protoperidinium parthenope</i>        | 0     | 0     | 62    | 0     | 0     | 0     |       |       |       | 180   | 22    | 50    | 0     | 0     | 0     | 0     | 0     |       |
| <i>Protoperidinium quinquecomae</i>      | 0     | 125   | 0     | 483   | 371   | 0     |       |       |       | 180   | 0     | 0     | 0     | 0     | 23    | 0     | 0     |       |
| <i>Protoperidinium subinermis</i>        | 0     | 0     | 77    | 0     | 0     | 0     |       |       |       | 0     | 0     | 0     | 0     | 0     | 0     | 0     | 0     |       |
| <i>Protoperidinium thorianum</i>         | 0     | 624   | 62    | 266   | 0     | 139   |       |       |       | 0     | 0     | 0     | 0     | 180   | 23    | 25    | 43    |       |
| <i>Protoperidinium</i> sp.1              | 116   | 0     | 356   | 83    | 93    | 46    |       |       |       | 180   | 108   | 25    | 209   | 144   | 93    | 75    | 628   |       |
| <i>Pyrophacus horologium</i>             | 116   | 0     | 0     | 50    | 0     | 46    |       |       |       | 18    | 0     | 0     | 0     | 36    | 0     | 175   | 281   |       |
| <i>Scrippsiella acuminata</i>            | 28525 | 27473 | 13051 | 17619 | 9926  | 11085 |       |       |       | 24802 | 14740 | 6843  | 13149 | 62590 | 24814 | 22478 | 6082  |       |
| <i>Scrippsiella ennisae</i>              | 928   | 1998  | 515   | 716   | 510   | 325   |       |       |       | 1443  | 173   | 275   | 23    | 72    | 232   | 125   | 22    |       |
| <i>Scrippsiella kirschiae</i>            | 0     | 0     | 0     | 0     | 0     | 0     |       |       |       | 90    | 0     | 0     | 0     | 0     | 0     | 0     | 0     |       |
| <i>Scrippsiella lachrymosa</i>           | 1160  | 874   | 62    | 532   | 232   | 46    |       |       |       | 541   | 43    | 25    | 139   | 72    | 23    | 50    | 87    |       |
| <i>Scrippsiella presciana</i>            | 1507  | 2123  | 62    | 0     | 0     | 0     |       |       |       | 0     | 0     | 0     | 0     | 0     | 0     | 0     | 0     |       |
| <i>Scrippsiella ramoni</i>               | 812   | 125   | 979   | 166   | 46    | 0     |       |       |       | 180   | 130   | 75    | 46    | 72    | 0     | 50    | 87    |       |
| <i>Scrippsiella spinifera</i>            | 116   | 375   | 51    | 0     | 93    | 46    |       |       |       | 0     | 0     | 0     | 0     | 0     | 0     | 0     | 0     |       |
| <i>Scrippsiella trifida</i>              | 0     | 0     | 124   | 0     | 0     | 0     |       |       |       | 0     | 0     | 0     | 0     | 0     | 0     | 0     | 0     |       |
| <i>Scrippsiella</i> sp.1                 | 3015  | 2622  | 3092  | 2912  | 2319  | 1855  |       |       |       | 5772  | 2532  | 724   | 719   | 1335  | 533   | 325   | 1169  |       |
| <i>Scrippsiella</i> sp.4                 | 0     | 0     | 77    | 50    | 139   | 0     |       |       |       | 0     | 22    | 50    | 116   | 1263  | 765   | 250   | 216   |       |
| <i>Scrippsiella</i> sp.5                 | 1160  | 3746  | 855   | 1498  | 1438  | 1670  |       |       |       | 1082  | 1082  | 450   | 881   | 1010  | 557   | 425   | 6948  |       |
| <i>Scrippsiella</i> sp.6                 | 1507  | 749   | 2123  | 349   | 93    | 93    |       |       |       | 5501  | 779   | 25    | 186   | 36    | 23    | 25    | 65    |       |
| <i>Scrippsiella</i> sp.8                 | 0     | 0     | 51    | 0     | 0     | 0     |       |       |       | 992   | 0     | 0     | 70    | 36    | 0     | 0     | 0     |       |
| <i>Thoracosphaeraeae</i> spp.            | 0     | 0     | 0     | 0     | 0     | 0     |       |       |       | 0     | 0     | 0     | 0     | 36    | 23    | 0     | 0     |       |
| <i>Wernowia rosea</i>                    | 0     | 0     | 0     | 0     | 0     | 0     |       |       |       | 0     | 22    | 0     | 46    | 36    | 0     | 0     | 0     |       |
| <i>Dinophyta</i> sp.2                    | 116   | 0     | 0     | 183   | 0     | 46    |       |       |       | 0     | 0     | 50    | 0     | 36    | 0     | 0     | 0     |       |
| <i>Dinophyta</i> sp.9                    | 0     | 0     | 0     | 83    | 278   | 23    |       |       |       | 0     | 65    | 50    | 0     | 0     | 0     | 0     | 0     |       |
| <i>Dinophyta</i> sp.14                   | 0     | 125   | 0     | 0     | 0     | 0     |       |       |       | 0     | 0     | 0     | 0     | 0     | 0     | 0     | 0     |       |
| <i>Dinophyta</i> sp.33                   | 0     | 0     | 124   | 83    | 0     | 46    |       |       |       | 180   | 0     | 0     | 0     | 0     | 93    | 0     | 0     |       |
| <i>Laboea striolata</i>                  | 0     | 0     | 0     | 0     | 278   | 93    |       |       |       | 0     | 43    | 0     | 0     | 0     | 0     | 0     | 87    |       |
| <i>Strombidium acutum</i>                | 0     | 0     | 0     | 333   | 0     | 510   |       |       |       | 0     | 90    | 0     | 75    | 70    | 0     | 0     | 0     |       |
| <i>Strombidium biarmatum</i>             | 0     | 0     | 62    | 832   | 0     | 46    |       |       |       | 271   | 0     | 0     | 25    | 0     | 0     | 0     | 0     |       |
| <i>Strombidium conicum</i>               | 232   | 0     | 247   | 250   | 186   | 0     |       |       |       | 541   | 433   | 350   | 70    | 0     | 23    | 175   | 195   |       |
| <i>Strombidium crassulum</i>             | 116   | 0     | 0     | 0     | 0     | 0     |       |       |       | 0     | 0     | 0     | 0     | 0     | 0     | 0     | 22    |       |
| <i>Cilophora</i> sp.2                    | 0     | 0     | 0     | 0     | 0     | 0     |       |       |       | 0     | 0     | 0     | 46    | 0     | 70    | 25    | 0     |       |
| <i>Cilophora</i> sp.5                    | 0     | 0     | 0     | 0     | 0     | 0     |       |       |       | 0     | 65    | 0     | 0     | 0     | 0     | 0     | 0     |       |
| <i>Cilophora</i> sp.6                    | 0     | 0     | 0     | 0     | 46    | 93    |       |       |       | 758   | 108   | 200   | 46    | 36    | 0     | 0     | 0     |       |
| <i>Synchaeta</i> sp.1 (smooth)           | 0     | 0     | 0     | 782   | 278   | 0     |       |       |       | 18    | 0     | 0     | 0     | 0     | 0     | 0     | 0     |       |
| <i>Synchaeta</i> sp.2 (tubular)          | 0     | 0     | 0     | 599   | 186   | 0     |       |       |       | 0     | 325   | 25    | 0     | 0     | 23    | 25    | 22    |       |
| <i>Synchaeta</i> sp.3 (spiny)            | 0     | 0     | 0     | 0     | 0     | 0     |       |       |       | 0     | 0     | 75    | 0     | 0     | 70    | 0     | 22    |       |
| <i>Acartia clausi/margalefi</i>          | 0     | 0     | 31    | 0     | 162   | 93    |       |       |       | 72    | 0     | 100   | 116   | 0     | 23    | 0     | 0     |       |
| <i>Acartia italica</i>                   | 162   | 275   | 93    | 133   | 23    | 23    |       |       |       | 54    | 65    | 325   | 232   | 1515  | 1925  | 1873  | 1364  |       |
| <i>Acartia</i> sp.2                      | 0     | 0     | 0     | 0     | 93    | 0     |       |       |       | 0     | 0     | 0     | 0     | 0     | 0     | 0     | 0     |       |
| <i>Centropages</i> sp. (resting egg)     | 2458  | 1723  | 294   | 407   | 464   | 301   |       |       |       | 0     | 0     | 0     | 0     | 0     | 23    | 125   | 43    |       |
| <i>Paracartia latsetosa</i>              | 4151  | 2647  | 788   | 659   | 394   | 232   |       |       |       | 90    | 0     | 0     | 46    | 289   | 1299  | 1598  | 2792  |       |
| <i>Ptenacartia josephinae</i>            | 232   | 0     | 0     | 0     | 0     | 0     |       |       |       | 0     | 0     | 0     | 0     | 0     | 0     | 0     | 0     |       |
| Cyst type 6                              | 0     | 0     | 0     | 0     | 0     | 0     |       |       |       | 0     | 0     | 25    | 0     | 0     | 0     | 0     | 0     |       |
| Resting egg 1                            | 0     | 0     | 0     | 0     | 0     | 0     |       |       |       | 0     | 22    | 0     | 0     | 0     | 0     | 0     | 0     |       |
| Resting egg 9                            | 0     | 0     | 0     | 50    | 23    | 0     |       |       |       | 36    | 108   | 0     | 0     | 36    | 0     | 0     | 0     |       |
| cysts m <sup>-2</sup> d <sup>-1</sup>    | 66489 | 59965 | 33287 | 37853 | 23933 | 23655 |       |       |       | 51371 | 34805 | 13911 | 24119 | 77706 | 34439 | 33092 | 24697 |       |
| taxa                                     | 33    | 28    | 44    | 40    | 39    | 40    |       |       |       | 41    | 38    | 37    | 37    | 40    | 38    | 38    | 36    |       |
