# Supplementary material
Source: MDPI journal article supplement (https://www.mdpi.com/2073-4441/13/24/3619)
Supplement: s1 [file s1]

## Supplementary Material 1 - Active stages in the water column (Niskin bottle)

[illegible]
