# Supplementary material
Source: MDPI journal article supplement (https://www.mdpi.com/2073-4441/13/24/3619)
Supplement: s1 [file s1]

# Supplementary Material 2 - Active stages in the water column (plankton net)

|               |                                  | 16.09.2010          |       |       | 14.10.2010 |       |      | 17.11.2010 |       |       | 15.12.2010 |      |      | 25.05.2011 |      |      | 21.06.2011 |      |      | 13.07.2011 |      |      | 10.08.2011 |      |     | 07.09.2011 |  |
|---------------|----------------------------------|---------------------|-------|-------|------------|-------|------|------------|-------|-------|------------|------|------|------------|------|------|------------|------|------|------------|------|------|------------|------|-----|------------|--|
|               |                                  | A                   | C     | A     | B          | C     | A    | B          | C     | A     | B          | C    | A    | B          | C    | A    | B          | C    | A    | B          | C    | A    | B          | C    | B   | C          |  |
| Protocista    | Foraminifera Miliolidae          | 0                   | 0     | 0     | 0          | 0     | 0    | 0          | 0     | 0     | 0          | 0    | 0    | 0          | 0    | 0    | 0          | 0    | 12   | 24         | 0    | 0    | 0          | 0    | 0   |            |  |
|               | Foraminifera Rotaliacea          | 0                   | 0     | 0     | 0          | 0     | 0    | 5          | 0     | 0     | 0          | 0    | 0    | 8          | 0    | 0    | 0          | 0    | 25   | 24         | 0    | 0    | 0          | 0    | 0   |            |  |
|               | Foraminifera Textulariacea       | 0                   | 0     | 29    | 0          | 0     | 0    | 0          | 0     | 0     | 0          | 0    | 0    | 0          | 0    | 0    | 0          | 0    | 0    | 7          | 0    | 0    | 0          | 0    | 0   |            |  |
|               | Foraminifera spiral              | 0                   | 0     | 0     | 0          | 0     | 0    | 0          | 0     | 0     | 0          | 0    | 0    | 0          | 0    | 0    | 50         | 25   | 24   | 0          | 0    | 0    | 0          | 0    |     |            |  |
|               | Foraminifera undet.              | 0                   | 0     | 0     | 0          | 0     | 0    | 0          | 0     | 0     | 0          | 0    | 0    | 0          | 0    | 0    | 0          | 0    | 12   | 0          | 0    | 0    | 0          | 0    |     |            |  |
|               | Globigerina sp.                  | 0                   | 0     | 29    | 0          | 9     | 0    | 0          | 7     | 0     | 0          | 0    | 0    | 0          | 0    | 0    | 0          | 0    | 24   | 0          | 0    | 0    | 0          | 0    |     |            |  |
|               | Radiolaria undet.                | 2391                | 4400  | 257   | 228        | 64    | 126  | 83         | 141   | 13    | 38         | 250  | 333  | 22         | 2029 | 1182 | 8889       | 2800 | 3779 | 370        | 118  | 0    | 625        | 1179 |     |            |  |
|               | Diploconus sp.                   | 1232                | 2233  | 57    | 142        | 0     | 0    | 0          | 0     | 0     | 0          | 0    | 0    | 0          | 0    | 0    | 0          | 0    | 0    | 0          | 0    | 0    | 0          | 0    | 0   |            |  |
|               | Acantharia undet.                | 2210                | 3633  | 342   | 712        | 37    | 0    | 0          | 0     | 0     | 0          | 0    | 0    | 0          | 0    | 0    | 0          | 0    | 0    | 0          | 0    | 0    | 0          | 0    | 0   |            |  |
|               | Codonellopsis sp.                | 181                 | 100   | 571   | 940        | 0     | 654  | 1111       | 94    | 64    | 94         | 0    | 0    | 0          | 0    | 0    | 0          | 0    | 0    | 0          | 0    | 0    | 357        | 214  |     |            |  |
|               | Coxiella sp.                     | 1014                | 1033  | 13413 | 9231       | 0     | 176  | 472        | 562   | 545   | 657        | 23   | 0    | 0          | 0    | 0    | 0          | 0    | 0    | 0          | 0    | 0    | 0          | 0    | 0   |            |  |
|               | Cyrtrocilis sp.                  | 0                   | 0     | 0     | 0          | 0     | 0    | 0          | 0     | 0     | 0          | 0    | 0    | 0          | 0    | 0    | 0          | 0    | 0    | 0          | 0    | 0    | 149        | 36   |     |            |  |
|               | Eutimninus sp.                   | 0                   | 0     | 0     | 0          | 0     | 0    | 0          | 0     | 0     | 0          | 68   | 259  | 0          | 0    | 0    | 0          | 50   | 0    | 0          | 0    | 0    | 0          | 0    | 0   |            |  |
|               | Favella sp.                      | 435                 | 500   | 0     | 0          | 0     | 0    | 0          | 0     | 0     | 0          | 0    | 0    | 0          | 0    | 0    | 7778       | 3400 | 0    | 0          | 0    | 0    | 1012       | 286  |     |            |  |
|               | Tiarina sp.                      | 0                   | 0     | 0     | 0          | 0     | 0    | 0          | 0     | 0     | 0          | 0    | 4    | 0          | 0    | 0    | 0          | 0    | 0    | 0          | 0    | 14   | 0          | 0    | 0   |            |  |
|               | Tintinnopsis sp.                 | 0                   | 0     | 29    | 0          | 0     | 2187 | 2583       | 1359  | 1827  | 1295       | 182  | 259  | 0          | 7792 | 5666 | 238        | 100  | 0    | 0          | 47   | 0    | 15         | 36   | 0   |            |  |
|               | Tintinnina undet.                | 326                 | 1200  | 656   | 1966       | 10020 | 0    | 194        | 7     | 0     | 150        | 23   | 37   | 74         | 0    | 0    | 0          | 0    | 818  | 0          | 0    | 262  | 0          | 0    | 0   |            |  |
|               | Ciliophora sp.a                  | 0                   | 0     | 0     | 0          | 0     | 0    | 0          | 0     | 0     | 0          | 0    | 0    | 0          | 0    | 0    | 0          | 50   | 0    | 0          | 0    | 0    | 0          | 0    | 0   |            |  |
|               | Medusae undet.                   | 0                   | 0     | 0     | 0          | 0     | 0    | 0          | 0     | 0     | 0          | 0    | 37   | 0          | 12   | 0    | 40         | 10   | 74   | 24         | 0    | 0    | 0          | 0    | 0   |            |  |
|               | Nemertea                         | plidium             | 0     | 0     | 0          | 0     | 0    | 0          | 0     | 0     | 16         | 0    | 0    | 0          | 0    | 0    | 0          | 0    | 0    | 0          | 0    | 0    | 0          | 0    | 0   | 0          |  |
|               | Platyhelminthes                  | larva Müller        | 0     | 0     | 0          | 0     | 0    | 0          | 0     | 0     | 0          | 0    | 0    | 0          | 24   | 16   | 0          | 0    | 0    | 0          | 0    | 0    | 0          | 0    | 0   | 0          |  |
|               | Rotifera                         | Synchaeta sp.       | 36    | 233   | 485        | 142   | 0    | 5480       | 5639  | 609   | 641        | 319  | 3643 | 2889       | 103  | 2192 | 2363       | 238  | 150  | 292        | 2716 | 3247 | 85         | 387  | 214 |            |  |
|               |                                  | Rotifera rough eggs | 0     | 0     | 0          | 0     | 0    | 0          | 0     | 0     | 0          | 0    | 0    | 0          | 0    | 0    | 27         | 0    | 0    | 0          | 0    | 0    | 0          | 0    | 0   | 0          |  |
|               | Nematoda                         | Nematoda undet.     | 0     | 0     | 0          | 0     | 0    | 0          | 0     | 0     | 0          | 0    | 0    | 0          | 0    | 0    | 0          | 0    | 0    | 0          | 0    | 0    | 6          | 0    | 0   |            |  |
| Mollusca      | Gastropoda veliger               | 2790                | 3000  | 32306 | 31909      | 18484 | 3243 | 3361       | 11366 | 11282 | 27102      | 569  | 889  | 559        | 3003 | 3061 | 8254       | 2900 | 3701 | 1605       | 3482 | 1034 | 1236       | 1607 |     |            |  |
|               | Gastropoda veliger               | 942                 | 1000  | 1027  | 1311       | 1098  | 302  | 250        | 164   | 160   | 113        | 638  | 1037 | 544        | 568  | 1504 | 6667       | 3600 | 4227 | 840        | 988  | 850  | 893        | 821  |     |            |  |
|               | Techosomata                      | 0                   | 0     | 0     | 0          | 0     | 0    | 0          | 0     | 0     | 19         | 0    | 0    | 0          | 0    | 12   | 8          | 0    | 0    | 0          | 0    | 7    | 21         | 36   |     |            |  |
| Bryozoa       | ancestrula type                  | 399                 | 300   | 0     | 0          | 0     | 0    | 0          | 0     | 0     | 0          | 0    | 0    | 0          | 0    | 40   | 25         | 0    | 198  | 71         | 0    | 89   | 71         | 0    |     |            |  |
|               | cifonantes                       | 0                   | 0     | 0     | 0          | 0     | 0    | 0          | 0     | 16    | 19         | 0    | 37   | 0          | 0    | 0    | 0          | 0    | 0    | 0          | 0    | 0    | 0          | 0    |     |            |  |
|               | sacculus                         | 0                   | 0     | 0     | 0          | 0     | 0    | 0          | 0     | 0     | 0          | 0    | 0    | 0          | 0    | 0    | 0          | 58   | 0    | 0          | 7    | 0    | 0          | 0    |     |            |  |
| Foronidea     | actinotrocha                     | 0                   | 0     | 0     | 0          | 0     | 0    | 0          | 0     | 0     | 0          | 0    | 0    | 0          | 0    | 8    | 0          | 0    | 12   | 0          | 0    | 0    | 0          | 0    |     |            |  |
| Polychaeta    | trochozoa                        | 0                   | 0     | 0     | 0          | 0     | 277  | 444        | 12    | 321   | 0          | 0    | 0    | 0          | 0    | 0    | 0          | 0    | 0    | 0          | 0    | 11   | 179        | 36   |     |            |  |
|               | larvae & juveniles undet.        | 326                 | 300   | 114   | 342        | 64    | 25   | 56         | 0     | 64    | 19         | 68   | 37   | 18         | 406  | 322  | 794        | 150  | 29   | 938        | 847  | 11   | 149        | 36   |     |            |  |
|               | Spionidae larvae                 | 0                   | 33    | 0     | 57         | 0     | 75   | 278        | 47    | 128   | 56         | 91   | 37   | 0          | 0    | 0    | 0          | 0    | 0    | 0          | 0    | 0    | 0          | 0    |     |            |  |
|               | Owenidae mitraria                | 0                   | 0     | 0     | 0          | 0     | 0    | 0          | 0     | 26    | 0          | 0    | 37   | 0          | 0    | 0    | 0          | 0    | 0    | 0          | 0    | 0    | 0          | 0    |     |            |  |
| Echinodermata | echinopluteus                    | 181                 | 133   | 14    | 28         | 46    | 25   | 0          | 47    | 26    | 19         | 34   | 37   | 37         | 12   | 8    | 40         | 50   | 0    | 25         | 0    | 0    | 0          | 0    |     |            |  |
|               | ophiopluteus                     | 0                   | 0     | 29    | 28         | 18    | 25   | 28         | 7     | 10    | 0          | 7    | 0    | 0          | 0    | 8    | 16         | 0    | 29   | 12         | 0    | 4    | 0          | 0    |     |            |  |
|               | auricolaria                      | 0                   | 0     | 0     | 0          | 0     | 0    | 0          | 0     | 0     | 0          | 46   | 37   | 4          | 0    | 0    | 0          | 0    | 0    | 0          | 0    | 0    | 0          | 0    |     |            |  |
| Chordata      | Ascidacea larva                  | 72                  | 33    | 14    | 57         | 0     | 25   | 56         | 23    | 26    | 9          | 37   | 37   | 22         | 122  | 54   | 56         | 0    | 19   | 49         | 0    | 30   | 71         | 0    |     |            |  |
|               | Larvacea undet.                  | 145                 | 200   | 771   | 1766       | 0     | 126  | 0          | 187   | 449   | 75         | 205  | 74   | 0          | 0    | 0    | 0          | 0    | 0    | 0          | 0    | 0    | 0          | 0    |     |            |  |
|               | Fritillia sp.                    | 0                   | 0     | 57    | 28         | 9     | 0    | 0          | 0     | 0     | 0          | 5    | 0    | 4          | 0    | 8    | 0          | 0    | 0    | 0          | 0    | 0    | 0          | 0    |     |            |  |
|               | Oikopleura sp.                   | 0                   | 0     | 0     | 0          | 366   | 0    | 0          | 0     | 0     | 0          | 0    | 88   | 568        | 322  | 79   | 0          | 29   | 222  | 282        | 92   | 298  | 214        |      |     |            |  |
|               | Branchiostoma larva              | 0                   | 0     | 0     | 0          | 0     | 0    | 0          | 0     | 0     | 0          | 23   | 19   | 5          | 12   | 8    | 0          | 0    | 0    | 0          | 0    | 0    | 0          | 0    |     |            |  |
|               | Osteychthyes eggs                | 0                   | 0     | 0     | 0          | 0     | 0    | 0          | 0     | 0     | 0          | 0    | 37   | 0          | 0    | 0    | 0          | 0    | 0    | 0          | 0    | 0    | 0          | 0    |     |            |  |
|               | Osteychthyes larva               | 0                   | 33    | 0     | 0          | 9     | 0    | 0          | 0     | 0     | 0          | 0    | 0    | 0          | 0    | 0    | 0          | 0    | 0    | 0          | 0    | 0    | 0          | 0    |     |            |  |
| Chaetognata   | Chaetognata undet.               | 0                   | 0     | 0     | 28         | 0     | 25   | 28         | 7     | 0     | 0          | 0    | 37   | 7          | 0    | 0    | 0          | 0    | 0    | 0          | 0    | 0    | 0          | 0    |     |            |  |
| Crustacea     | Acartidae nauplius               | 254                 | 333   | 0     | 0          | 0     | 50   | 28         | 94    | 353   | 38         | 159  | 222  | 0          | 1380 | 752  | 635        | 650  | 0    | 49         | 94   | 0    | 149        | 250  |     |            |  |
|               | Calanidae nauplius               | 435                 | 500   | 257   | 228        | 0     | 277  | 167        | 187   | 449   | 1351       | 182  | 259  | 0          | 325  | 161  | 1746       | 100  | 0    | 0          | 0    | 0    | 0          | 0    |     |            |  |
|               | Canuellidae nauplius             | 0                   | 0     | 0     | 0          | 0     | 0    | 0          | 0     | 0     | 0          | 0    | 0    | 0          | 0    | 0    | 50         | 0    | 74   | 71         | 0    | 0    | 36         | 0    |     |            |  |
|               | Centropagidae nauplius           | 1812                | 2467  | 828   | 712        | 0     | 377  | 250        | 680   | 1282  | 526        | 114  | 185  | 0          | 325  | 322  | 476        | 150  | 0    | 346        | 659  | 0    | 179        | 571  |     |            |  |
|               | Cirripedia Balanomorfia nauplius | 72                  | 33    | 57    | 28         | 46    | 8    | 0          | 0     | 16    | 38         | 46   | 19   | 0          | 12   | 0    | 0          | 0    | 25   | 24         | 0    | 0    | 0          | 0    |     |            |  |
|               | Cirripedia Lepodomorfia nauplius | 0                   | 0     | 0     | 0          | 0     | 0    | 0          | 0     | 0     | 0          | 5    | 74   | 11         | 0    | 0    | 0          | 0    | 0    | 0          | 0    | 0    | 0          | 0    |     |            |  |
|               | Cyclopoida nauplius              | 0                   | 0     | 114   | 0          | 165   | 0    | 0          | 0     | 0     | 0          | 23   | 0    | 177        | 0    | 0    | 0          | 156  | 0    | 0          | 14   | 0    | 0          | 0    |     |            |  |
|               | Facetotecta Y nauplius           | 0                   | 0     | 0     | 0          | 0     | 0    | 0          | 0     | 10    | 0          | 0    | 0    | 0          | 12   | 0    | 0          | 0    | 0    | 0          | 0    | 0    | 0          | 0    |     |            |  |
|               | Harpacticoida nauplius           | 507                 | 600   | 0     | 28         | 0     | 0    | 167        | 141   | 160   | 94         | 91   | 148  | 0          | 0    | 0    | 0          | 0    | 0    | 0          | 0    | 0    | 0          | 0    |     |            |  |
|               | Longipedia sp. nauplius          | 0                   | 0     | 685   | 370        | 101   | 50   | 28         | 47    | 16    | 13         | 205  | 407  | 81         | 731  | 752  | 952        | 750  | 487  | 938        | 565  | 28   | 268        | 214  |     |            |  |
|               | Euterpina sp. nauplius           | 0                   | 0     | 0     | 0          | 0     | 0    | 0          | 0     | 0     | 0          | 0    | 0    | 0          | 244  | 81   | 635        | 250  | 0    | 148        | 847  | 0    | 298        | 250  |     |            |  |
|               | Oithonidae nauplius              | 14420               | 12900 | 1941  | 2051       | 0     | 930  | 694        | 937   | 1538  | 1295       | 3643 | 2815 | 0          | 812  | 698  | 5079       | 1000 | 0    | 2469       | 2918 | 0    | 2143       | 1500 |     |            |  |
|               | Temoridae nauplius               | 0                   | 67    | 143   | 28         | 0     | 0    | 0          | 0     | 0     | 0          | 0    | 0    | 0          | 0    | 0    | 0          | 0    | 0    | 47         | 0    | 0    | 0          | 0    |     |            |  |
|               | Calanoida copepodids             | 326                 | 200   | 828   | 655        | 9     | 905  | 472        | 680   | 545   | 338        | 91   | 111  | 0          | 0    | 0    | 0          | 49   | 123  | 24         | 0    | 0    | 0          | 36   |     |            |  |
|               | Acartidae copepodids             | 254                 | 33    | 57    | 484        | 0     | 0    | 0          | 0     | 0     | 0          | 91   | 74   | 0          | 162  | 107  | 952        | 200  | 409  | 864        | 1176 | 0    | 685        | 679  |     |            |  |
|               | Canuellidae copepodids           | 0                   | 0     | 0     | 0          | 0     | 0    | 0          | 0     | 6     | 0          | 0    | 0    | 15         | 0    | 0    | 40         | 50   | 58   | 12         | 24   | 0    | 0          | 71   |     |            |  |
|               | Centropagidae copepodids         | 36                  | 33    | 0     | 0          | 311   | 8    | 0          | 0     |       |            |      |      |            |      |      |            |      |      |            |      |      |            |      |     |            |  |
